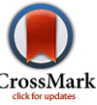

## Correction

# Correction: Adenosine Prevents TNF $\alpha$ -Induced Decrease in Endothelial Mitochondrial Mass via Activation of eNOS-PGC-1 $\alpha$ Regulatory Axis

The *PLOS ONE* Staff

## Notice of Republication

This article was republished on July 1st, 2014, due to panel B of Figure 3 being erroneously removed during the production process. The publisher apologizes for this error. Please download the PDF again to view the corrected article and the complete Figure 3. The originally published, uncorrected article and the republished, corrected article are provided here for reference.

## Supporting Information

File S1. Originally published, uncorrected article (PDF)

File S2. Republished, corrected article (PDF)

## Reference

1. Kalogeris TJ, Baines C, Korthuis RJ (2014) Adenosine Prevents TNF $\alpha$ -Induced Decrease in Endothelial Mitochondrial Mass via Activation of eNOS-PGC-1 $\alpha$  Regulatory Axis. *PLoS ONE* 9(6): e98459. doi:10.1371/journal.pone.0098459

**Citation:** The *PLOS ONE* Staff (2014) Correction: Adenosine Prevents TNF $\alpha$ -Induced Decrease in Endothelial Mitochondrial Mass via Activation of eNOS-PGC-1 $\alpha$  Regulatory Axis. *PLoS ONE* 9(7): e103692. doi:10.1371/journal.pone.0103692

**Published** July 21, 2014

**Copyright:** © 2014 The *PLOS ONE* Staff. This is an open-access article distributed under the terms of the Creative Commons Attribution License, which permits unrestricted use, distribution, and reproduction in any medium, provided the original author and source are credited.
